# Supplementary material for: Telomere Length Variation in Model Bryophytes
Source: MDPI journal article supplement (doi:10.3390/plants13030387), 2024-01-28
Supplement: s1 [file s1]

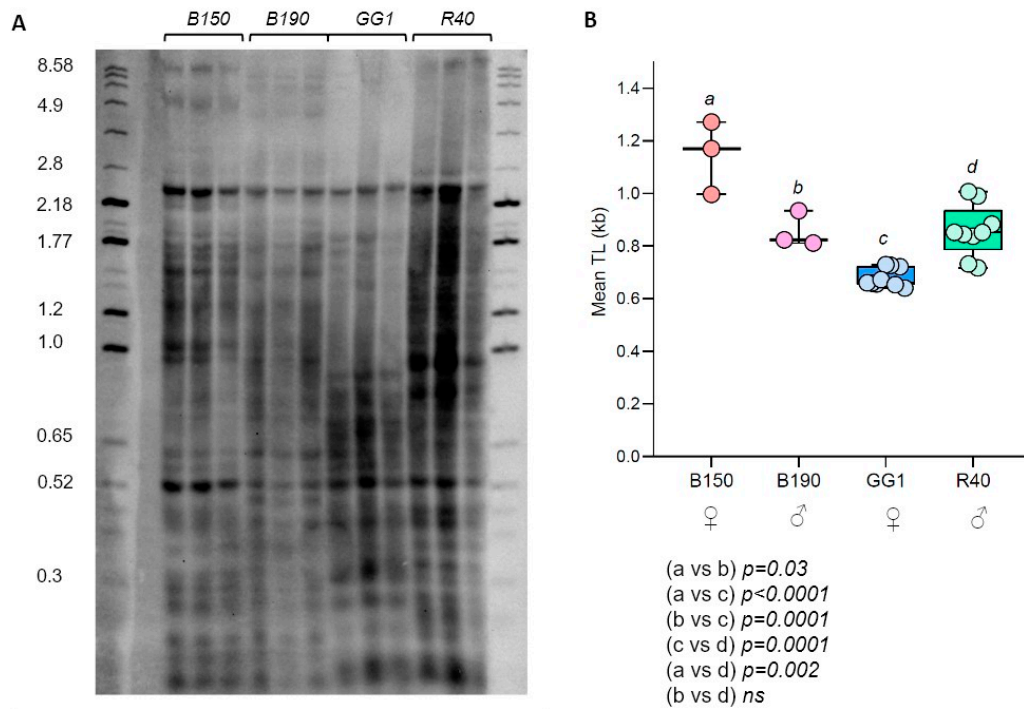

**Supplemental Figure S1. Telomere length variation in *C. purpureus* ecotypes.** (A) TRF Southern blot for DNA from *C. purpureus* lines B150 (female), B190 (male), GG1 (female) and R40 (male) digested with *TruI*. Molecular weight DNA markers (in kb) are shown. (B) Telomere length (mean TRF) distributions in  $\geq 3$  biological replicates of each genotype are shown in boxplots. Significant  $p$ -values are shown; ns - no significant differences.

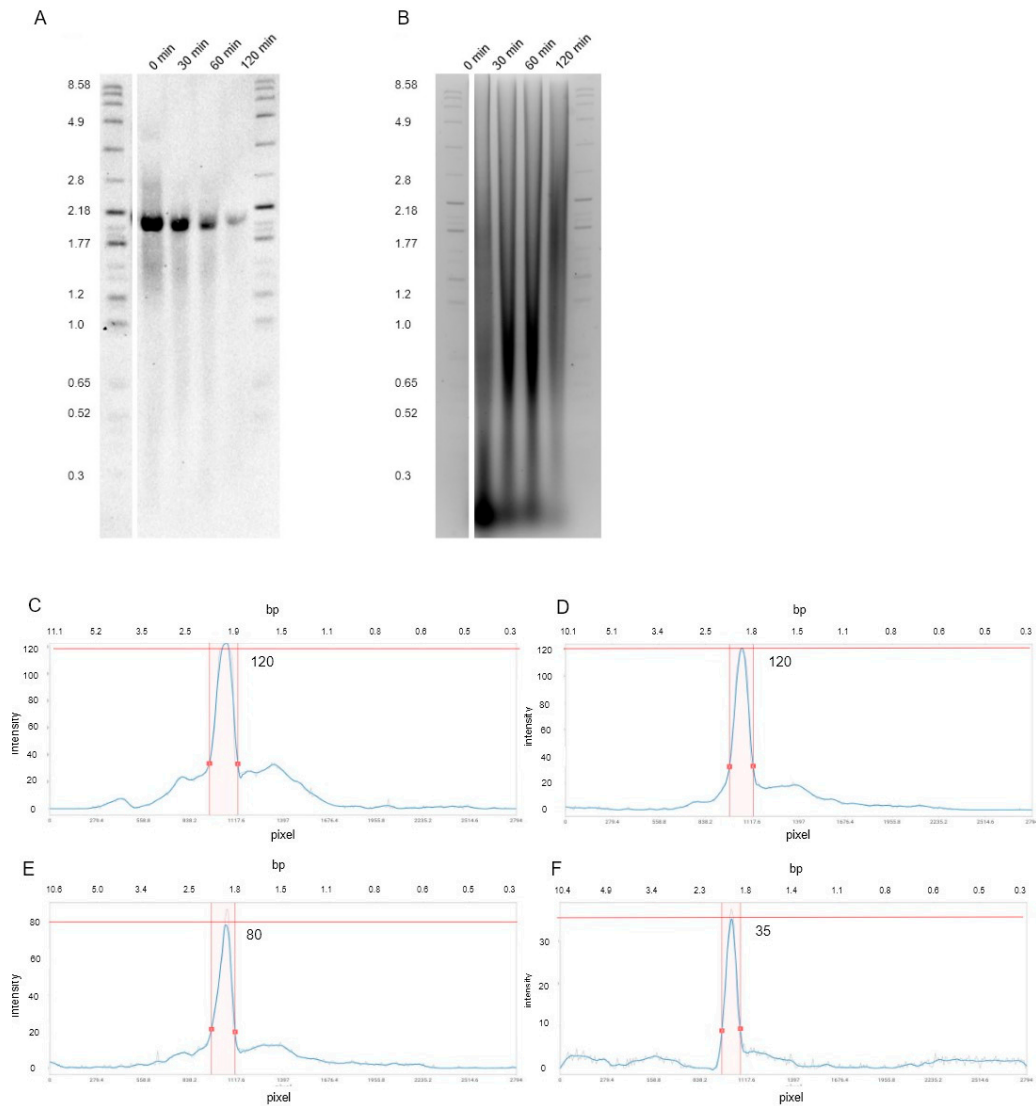

**Supplemental Figure S2. Analysis of sensitivity of *S. fallax* telomeric DNA to *BAL31* nuclease.** TRF Southern blot (A) and agarose gel (B) for *BAL31*-digested *S. fallax* MW DNA. Lanes show *TruII* digestion of *S. fallax* genomic DNA without prior *Bal31* treatment (0 min), and after various incubation periods with *Bal31* exonuclease (30, 60, 120 min). Molecular weight markers are shown in kb. WALTER software quantifications of signal intensity from telomeric DNA treated with *BAL31* for 0 min (C), 30 min (D), 60 min (E), and 120 min (F) are shown. Red lines show signal intensity for 2.1 kb band.

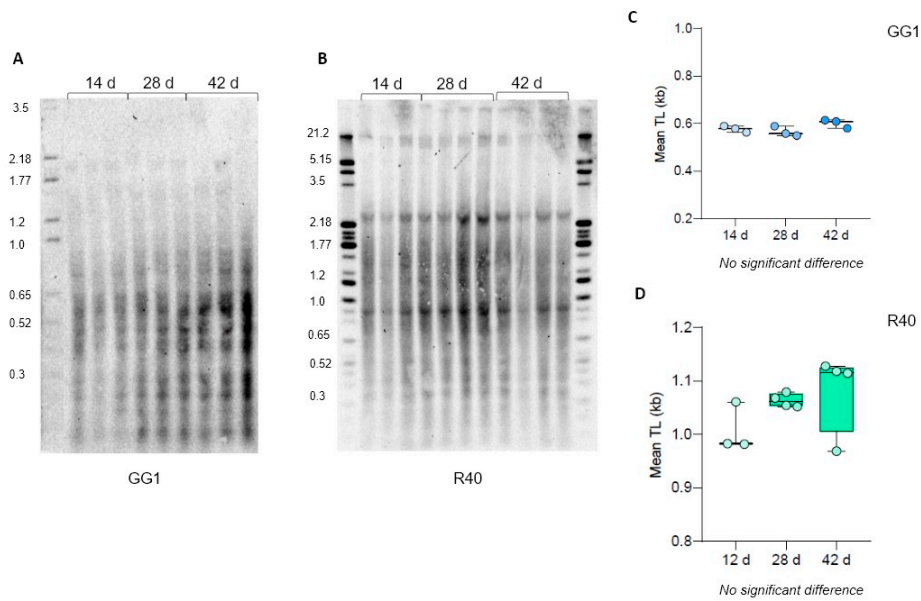

**Supplemental Figure S3. Telomere length dynamics in *C. purpureus* GG1 and R40 ecotypes.** TRF Southern blots for DNA from 14-, 28- and 42-day protonema cultures of GG1 (A) and R40 (B) ecotypes digested with *TruII*. Telomere length (mean TRF) distributions in 3 biological replicates of GG1 (C) and R40 (D) cultures are shown in boxplots. No significant changes in telomere length are detected.

**Supplemental Table S1. Telomere length distribution in *P. patens* ecotypes, in kb.**

| Telomere length | Gd        | Re        | Ka        | Vx        |
|-----------------|-----------|-----------|-----------|-----------|
| Mean            | 1.21±0.06 | 1.29±0.04 | 1.08±0.13 | 1,71±0,19 |
| Min             | 0.67±0.03 | 0.88±0.12 | 0.70±0.07 | 0,95±0,18 |
| 1st Quartile    | 0.88±0.04 | 1.08±0.09 | 0.85±0.10 | 1,32±0,15 |
| Median          | 1.14±0.04 | 1.27±0.04 | 1.03±0.14 | 1,67±0,18 |
| 3rd Quartile    | 1.62±0.13 | 1.53±0.13 | 1.34±0.19 | 2,14±0,34 |
| Max             | 3.16±0.41 | 2.25±0.26 | 2.41±0.69 | 3,93±1,67 |

**Supplemental Table S2. Telomere length distribution in *P. patens* Gd and Re ecotypes (in kb) treated with different enzyme combinations.**

| Telomere length | Gd                          |                                           | Re                          |                                           |
|-----------------|-----------------------------|-------------------------------------------|-----------------------------|-------------------------------------------|
|                 | <i>TruI</i> and <i>RsaI</i> | <i>HaeIII</i> , <i>MboI</i> , <i>AluI</i> | <i>TruI</i> and <i>RsaI</i> | <i>HaeIII</i> , <i>MboI</i> , <i>AluI</i> |
| Mean            | 1.15±0.004                  | 1.17±0.012                                | 1.35±0.07                   | 1.46±0.05                                 |
| Min             | 0.79±0.02                   | 0.88±0.001                                | 1.04±0.11                   | 1.14±0.03                                 |
| 1st Quartile    | 1.01±0.01                   | 1.00±0.001                                | 1.22±0.08                   | 1.31±0.03                                 |
| Median          | 1.15±0.004                  | 1.15±0.006                                | 1.34±0.06                   | 1.44±0.04                                 |
| 3rd Quartile    | 1.30±0.008                  | 1.35±0.03                                 | 1.48±0.07                   | 1.63±0.07                                 |
| Max             | 1.65±0.04                   | 1.84±0.17                                 | 1.90±0.09                   | 2.12±0.14                                 |

**Supplemental Table S3. Telomere lengths distribution in *C. purpureus* isolates, in kb.**

| Telomere length | B150      | B190      | GG1       | R40       |
|-----------------|-----------|-----------|-----------|-----------|
| Mean            | 1.15±0.14 | 0.86±0.07 | 0.68±0.04 | 0.85±0.10 |
| Min             | 0.57±0.01 | 0.47±0.08 | 0.43±0.06 | 0.46±0.11 |
| 1st Quartile    | 0.90±0.14 | 0.65±0.07 | 0.58±0.04 | 0.63±0.09 |
| Median          | 1.13±0.16 | 0.81±0.07 | 0.66±0.03 | 0.81±0.08 |
| 3rd Quartile    | 1.41±0.11 | 1.11±0.06 | 0.80±0.03 | 1.12±0.15 |
| Max             | 2.20±0.04 | 2.38±0.18 | 1.41±0.42 | 1.86±0.46 |

**Supplemental Table S4. Telomere length distribution (in kb) in *C. purpureus* ecotypes treated with different enzyme combinations.**

| Telomere length | GG1                       |                                           | R40                       |                                           |
|-----------------|---------------------------|-------------------------------------------|---------------------------|-------------------------------------------|
|                 | <i>TruI</i> , <i>RsaI</i> | <i>HaeIII</i> , <i>MboI</i> , <i>AluI</i> | <i>TruI</i> , <i>RsaI</i> | <i>HaeIII</i> , <i>MboI</i> , <i>AluI</i> |
| Mean            | 0.61±0.02                 | 1.53±0.11                                 | 0.90±0.11                 | 1.42±0.03                                 |
| Min             | 0.48±0.01                 | 1.14±0.03                                 | 0.52±0.06                 | 1.11±0.11                                 |
| 1st Quartile    | 0.53±0.01                 | 1.33±0.03                                 | 0.67±0.14                 | 1.29±0.04                                 |
| Median          | 0.60±0.02                 | 1.47±0.07                                 | 0.89±0.15                 | 1.39±0.03                                 |
| 3rd Quartile    | 0.70±0.04                 | 1.79±0.23                                 | 1.14±0.05                 | 1.59±0.04                                 |
| Max             | 0.98±0.05                 | 3.21±1.02                                 | 1.61±0.11                 | 2.36±0.06                                 |

**Supplemental Table S5. Telomere length distribution in *M. polymorpha* ecotypes, in kb.**

| Telomere length | Tak-1     | Tak-2     |
|-----------------|-----------|-----------|
| Mean            | 2.15±0.25 | 2.45±0.25 |
| Min             | 1.54±0.17 | 1.55±0.20 |
| 1st Quartile    | 1.83±0.21 | 1.87±0.20 |
| Median          | 2.11±0.27 | 2.36±0.28 |
| 3rd Quartile    | 2.52±0.29 | 3.12±0.32 |
| Max             | 3.41±0.40 | 4.64±0.21 |



**Supplemental Table S6. Telomere length distribution in *Sphagnum* isolates, in kb.**

| Telomere length | <i>S. fallax</i> | <i>Sphagnum sp.</i> | <i>S. girgensohnii</i> |
|-----------------|------------------|---------------------|------------------------|
| Mean            | 1.86±0.08        | 1.35±0.11           | 1.56±0.21              |
| Min             | 1.12±0.21        | 1.06±0.01           | 0.91±0.16              |
| 1st Quartile    | 1.61±0.11        | 1.12±0.07           | 1.25±0.16              |
| Median          | 1.91±0.10        | 1.33±0.10           | 1.54±0.23              |
| 3rd Quartile    | 2.06±0.06        | 1.60±0.16           | 1.88±0.25              |
| Max             | 3.39±1.15        | 2.34±0.11           | 3.56±0.86              |
